# Supplementary material
Source: PubMed Central journal article supplement (PMC7305115)
Supplement: 41396_2020_633_MOESM1_ESM.pdf [file 41396_2020_633_MOESM1_ESM.pdf]

## SUPPLEMENTARY INFORMATION

### ***Burkholderia insecticola* triggers midgut closure in the bean bug *Riptortus pedestris* to prevent secondary bacterial infections of midgut crypts**

Yoshitomo Kikuchi, Tsubasa Ohbayashi, Seonghan Jang and Peter Mergaert

#### **Supplementary Materials and Methods**

##### **Microscopic observations of dissected symbiotic organs**

The insects administered with the GFP-labeled or RFP labelled strains were dissected in phosphate-buffered saline (PBS: 137 mM NaCl, 8.1 mM Na<sub>2</sub>HPO<sub>4</sub>, 2.7 mM KCl, 1.5 mM KH<sub>2</sub>PO<sub>4</sub> [pH7.4]) using fine forceps under a dissection microscope (S8APO, Leica; MZ FZ III, Leica). Pictures of the dissected tissues were taken by a digital camera (EC3, Leica) and the width of the CR and M4B were measured using ImageJ software (Schneider *et al.* 2012). To investigate the infection process, freshly dissected midguts were stained with 4',6-diamidino-2-phenylindole (DAPI) and observed under an epifluorescence microscope (DMI4000B, Leica). For analysis of phalloidin-stained tissues, the dissected midguts were fixed with 4% paraformaldehyde for 10 min at room temperature, washed twice in PBS, incubated in PBS containing 0.1% Triton X-100 for 5 min, stained with 0.5 μM of SYTOX Green and 5 units/ml of Alexa Fluor555 phalloidin (ThermoFisher) in PBS for 20 min, washed twice in PBS, and mounted on silane-coated glass slides and observed with a confocal laser scanning microscope (TCS SP8, Leica).

##### **Oral inoculation of colonization-deficient mutants and non-symbiotic bacteria**

Immediately after 1<sup>st</sup> instar nymphs molted to the 2<sup>nd</sup> instar, DWA was removed from the rearing containers so that the nymphs were kept without drinking water overnight and

became thirsty. Then DWA containing  $10^4$  cells/ $\mu\text{l}$  of each GFP-labelled strain was supplied to the rearing containers for 24 h. After 24 h, the symbiont-containing DWA was replaced by symbiont-free DWA, and the nymphs were further reared in the absence of bacteria during the instar. After the 2<sup>nd</sup> instar nymphs molted to 3<sup>rd</sup> instar, DWA containing  $10^4$  cells/ $\mu\text{l}$  of the RFP-labelled KT39 was supplied to the rearing containers for 24 h. These nymphs were further reared for two days with symbiont-free DWA, and then dissected to check their infection status of the GFP and RFP strains.

### **Bottleneck estimation**

To estimate how many symbiont cells can infect the symbiotic region before the midgut closure, co-inoculation of the GFP-labelled strain RPE225 ( $R_f^+$ ,  $K_m^+$ ) and the non-labelled wild type strain RPE75 ( $R_f^+$ ) was performed. The non-labelled symbiont and GFP-labelled symbiont were mixed in different ratios (GFP-labelled symbiont:non-labelled symbiont = 1:10, 1:10<sup>2</sup>, 1:10<sup>3</sup>, 1:1.65x10<sup>3</sup>, 1:5.0x10<sup>3</sup>, 1:10<sup>4</sup>, 1:1.5x10<sup>4</sup>, 1:4.6x10<sup>4</sup> or 1:2.2x10<sup>5</sup>). Symbiont cells were diluted in DWA to a cell density of 10<sup>5</sup> CFU/ $\mu\text{l}$ , and 2<sup>nd</sup> instar nymphs were fed with 1  $\mu\text{l}$  of the solution as above. Six to sixteen insects were inoculated per dilution. Three days after inoculation, the symbiotic organ (M4+M4B) was dissected and its content was plated on a YG plate containing kanamycin 30  $\mu\text{g/ml}$  to check whether GFP-labelled symbionts entered the symbiotic organ. Insects were counted as positive for infection with the GFP-labelled symbiont if at least one colony of the GFP-labelled symbiont was detected.

Schneider CA, Rasband WS, Eliceiri KW. NIH Image to ImageJ: 25 years of image analysis. *Nat Methods*. 2012; 9: 671-675.
