# Supplementary material
Source: PubMed Central journal article supplement (PMC7305115)
Supplement: 41396_2020_633_MOESM2_ESM.pdf [file 41396_2020_633_MOESM2_ESM.pdf]

**Table S1.** Bacterial strains used in this study.

| Bacterial species/strain                          | Description                                              | Fruorecent protein | Antibiotic resistance             | Reference <sup>d</sup>            |
|---------------------------------------------------|----------------------------------------------------------|--------------------|-----------------------------------|-----------------------------------|
| <b>Symbiont (<i>Burkholderia insecticola</i>)</b> |                                                          |                    |                                   |                                   |
| <b>Wild type</b>                                  |                                                          |                    |                                   |                                   |
| RPE75                                             | Rifampicin-resistant derivative of the type strain RPE64 | none               | Rif <sup>R</sup>                  | Kikuchi et al., AEM 2011 (1)      |
| RPE225                                            | GFP-labelled symbiont                                    | GFP <sup>b</sup>   | Km <sup>R</sup> , Cm <sup>R</sup> | Kikuchi&Fukatsu Mol Ecol 2014 (2) |
| KT39                                              | RFP-labelled symbiont                                    | RFP <sup>b</sup>   | Km <sup>R</sup>                   | Itoh et al., PNAS, 2019 (3)       |
| KT33 <sup>a</sup>                                 | GFP-labelled, Cm-susceptible symbiont                    | GFP <sup>b</sup>   | Km <sup>R</sup>                   | This study                        |
| RPE744 <sup>a</sup>                               | RFP-labelled, Cm-resistant symbiont                      | RFP <sup>c</sup>   | Cm <sup>R</sup>                   | This study                        |
| <b>Colonization-deficient mutants</b>             |                                                          |                    |                                   |                                   |
| <i>flhC</i> ::Tn5                                 | Flagella mutant; Reaches M3 but is blocked by CR         | GFP <sup>b</sup>   | Km <sup>R</sup> , Cm <sup>R</sup> | Ohbayashi et al. PNAS 2015 (4)    |
| <i>purL</i> ::Tn5                                 | Purine biosynthesis mutant; Poor crypt colonization      | GFP <sup>b</sup>   | Km <sup>R</sup> , Cm <sup>R</sup> | Kim et al., ISME J 2014 (5)       |
| <i>Awaaf</i>                                      | LPS biosynthesis mutant; Poor crypt colonization         | GFP <sup>b</sup>   | Km <sup>R</sup> , Cm <sup>R</sup> | Kim et al. JBC 2017 (6)           |
| <i>AphaB</i>                                      | PHA biosynthesis mutant; Poor crypt colonization         | GFP <sup>b</sup>   | Km <sup>R</sup> , Cm <sup>R</sup> | Kim et al. PNAS 2013 (7)          |
| <b>Non-symbiotic bacteria</b>                     |                                                          |                    |                                   |                                   |
| <i>Burkholderia fungorum</i> JCM21562             | Colonizes crypts partially; Beneficial to the bean bug   | GFP <sup>b</sup>   | Km <sup>R</sup> , Cm <sup>R</sup> | Itoh et al., PNAS, 2019 (3)       |
| <i>Pandoraea norimbergensis</i> JCM10565          | Colonizes crypts partially; Beneficial to the bean bug   | GFP <sup>b</sup>   | Km <sup>R</sup> , Cm <sup>R</sup> | Itoh et al., PNAS, 2019 (3)       |
| <i>Escherichia coli</i> WM3064                    | Reaches M3 but is blocked by CR                          | GFP <sup>b</sup>   | Km <sup>R</sup>                   | This study                        |
| <i>Cupriavidus taiwanensis</i> DSM17343           | Reaches M3 but is blocked by CR                          | GFP <sup>b</sup>   | Km <sup>R</sup> , Cm <sup>R</sup> | Itoh et al., PNAS, 2019 (3)       |

<sup>a</sup>These strains were used in the experimental removal of crypt-colonizing symbionts by antibiotic treatment (Fig. 5).

<sup>b</sup>GFP/RFP was labelled by the Tn7 minitransposon system.

<sup>c</sup>RFP was labelled with the RFP-encoding stable plasmid pIN29.

<sup>d</sup>references: (1) Kikuchi Y, Meng XY, Fukatsu T. Gut symbiotic bacteria of the genus *Burkholderia* in the broad-headed bugs *Riptortus clavatus* and *Leptocoris chinensis* (Heteroptera: Alydidae). *Appl Environ Microbiol* 2005; **71**: 4035-4043; (2) Kikuchi Y, Fukatsu T. Live imaging of symbiosis: spatiotemporal infection dynamics of a GFP-labelled *Burkholderia* symbiont in the bean bug *Riptortus pedestris*. *Mol Ecol* 2014; **23**: 1445-1456; (3) Itoh H, Jang S, Takeshita K, Ohbayashi T, Ohnishi N, Meng XY *et al.* Host-symbiont specificity determined by microbe-microbe competition in an insect gut. *Proc Natl Acad Sci USA* 2019; **116**: 22673-22682; (4) Ohbayashi T, Takeshita K, Kitagawa W, Nikoh N, Koga R, Meng XY *et al.* Insect's intestinal organ for symbiont sorting. *Proc Natl Acad Sci USA* 2015; **112**: E5179-E5188; (5) Kim JK, Jang HA, Won YJ, Kikuchi Y, Heum Han S, Kim CH *et al.* Purine biosynthesis-deficient *Burkholderia* mutants are incapable of symbiotic accommodation in the stinkbug. *ISME J* 2014; **8**: 552-63; (6) Kim JK, Jang HA, Kim MS, Cho JH, Lee JB, Lorenzo FD *et al.* The lipopolysaccharide core oligosaccharide of *Burkholderia* plays a critical role in maintaining a proper gut symbiosis with the bean bug *Riptortus pedestris*. *J Biol Chem* 2017; **292**: 19226-19237; (7) Kim JK, Won YJ, Nikoh N, Nakayama H, Han SH, Kikuchi Y *et al.* Polyester synthesis genes associated with stress resistance are involved in an insect-bacterium symbiosis. *Proc Natl Acad Sci USA*. 2013; **110**: E2381-9.
