# Supplementary material
Source: PubMed Central journal article supplement (PMC7305115)
Supplement: 41396_2020_633_MOESM3_ESM.pdf [file 41396_2020_633_MOESM3_ESM.pdf]

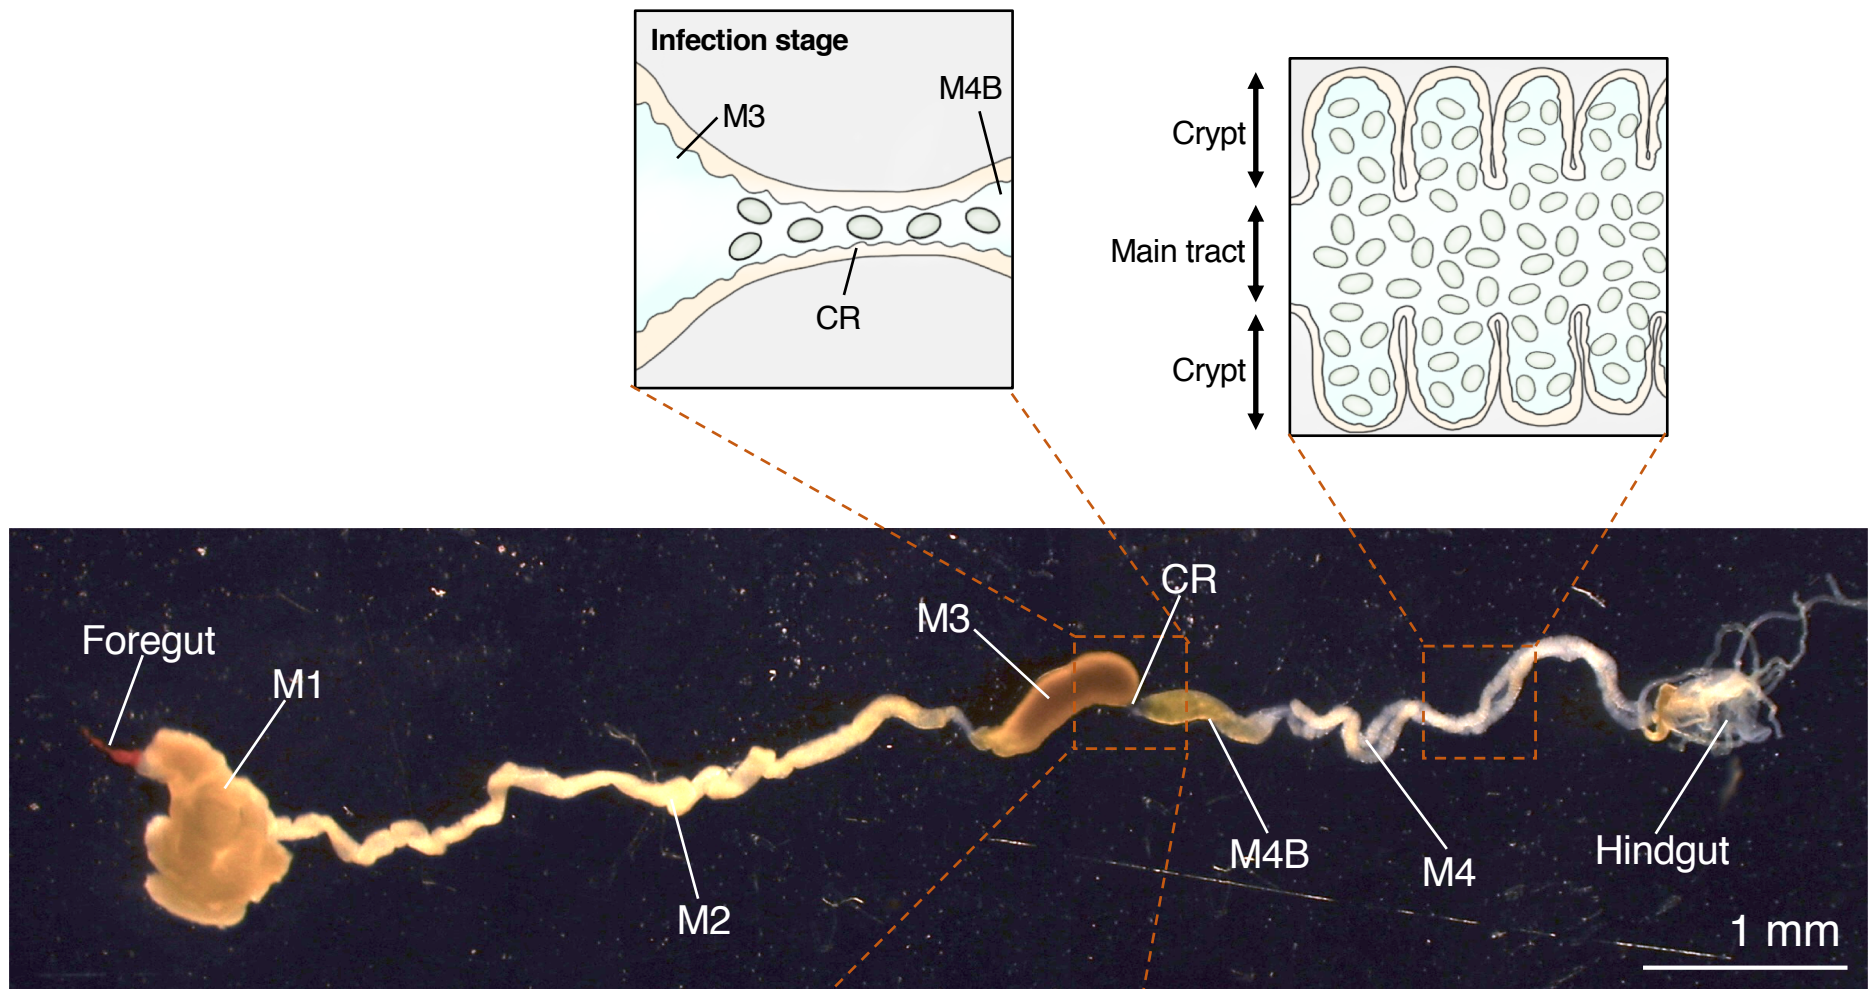

**Fig. S1. Whole gut of the bean bug *R. pedestris*.** The foregut, midgut (M1-M4), and hindgut are shown. The *Burkholderia* symbiont penetrates from M3 to M4B through the constricted region during infection. After colonization, the constricted region is closed and completely sealed (see Fig. 1, Fig. 2d, and Fig. S2). Abbreviations: M1, midgut 1<sup>st</sup> section; M2, midgut 2<sup>nd</sup> section; M3, midgut 3<sup>rd</sup> section; M4, midgut 4<sup>th</sup> section (crypt-bearing symbiotic region); CR, constricted region; M4B, M4 bulb.
