# Supplementary material
Source: PubMed Central journal article supplement (PMC7305115)
Supplement: 41396_2020_633_MOESM6_ESM.pdf [file 41396_2020_633_MOESM6_ESM.pdf]

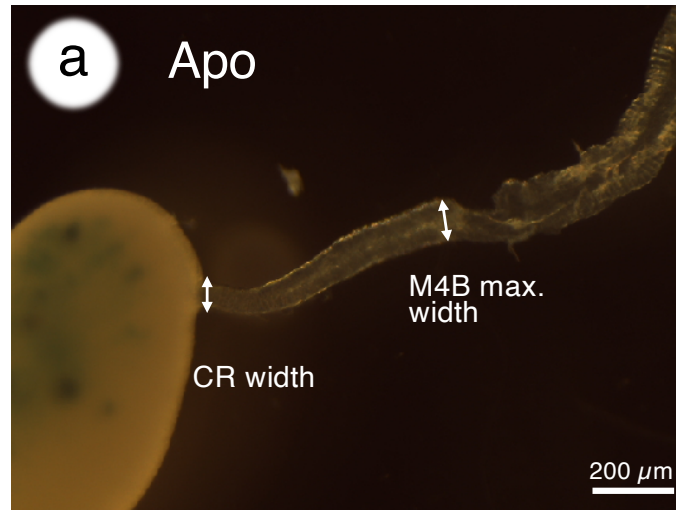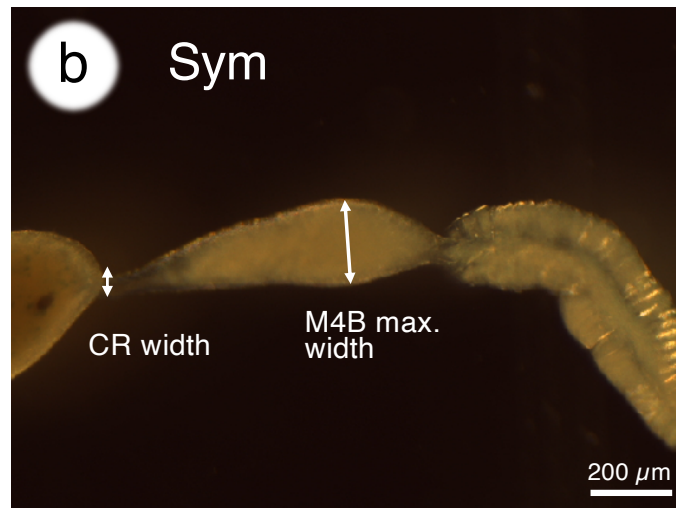

**Fig. S4. Measured parts of the constricted region and M4B.** The figure indicates the measurements performed for Fig. 1s and t. In M4B, the maximum width was measured.
