# Supplementary material
Source: PubMed Central journal article supplement (PMC7305115)
Supplement: 41396_2020_633_MOESM8_ESM.pdf [file 41396_2020_633_MOESM8_ESM.pdf]

# 12h interval

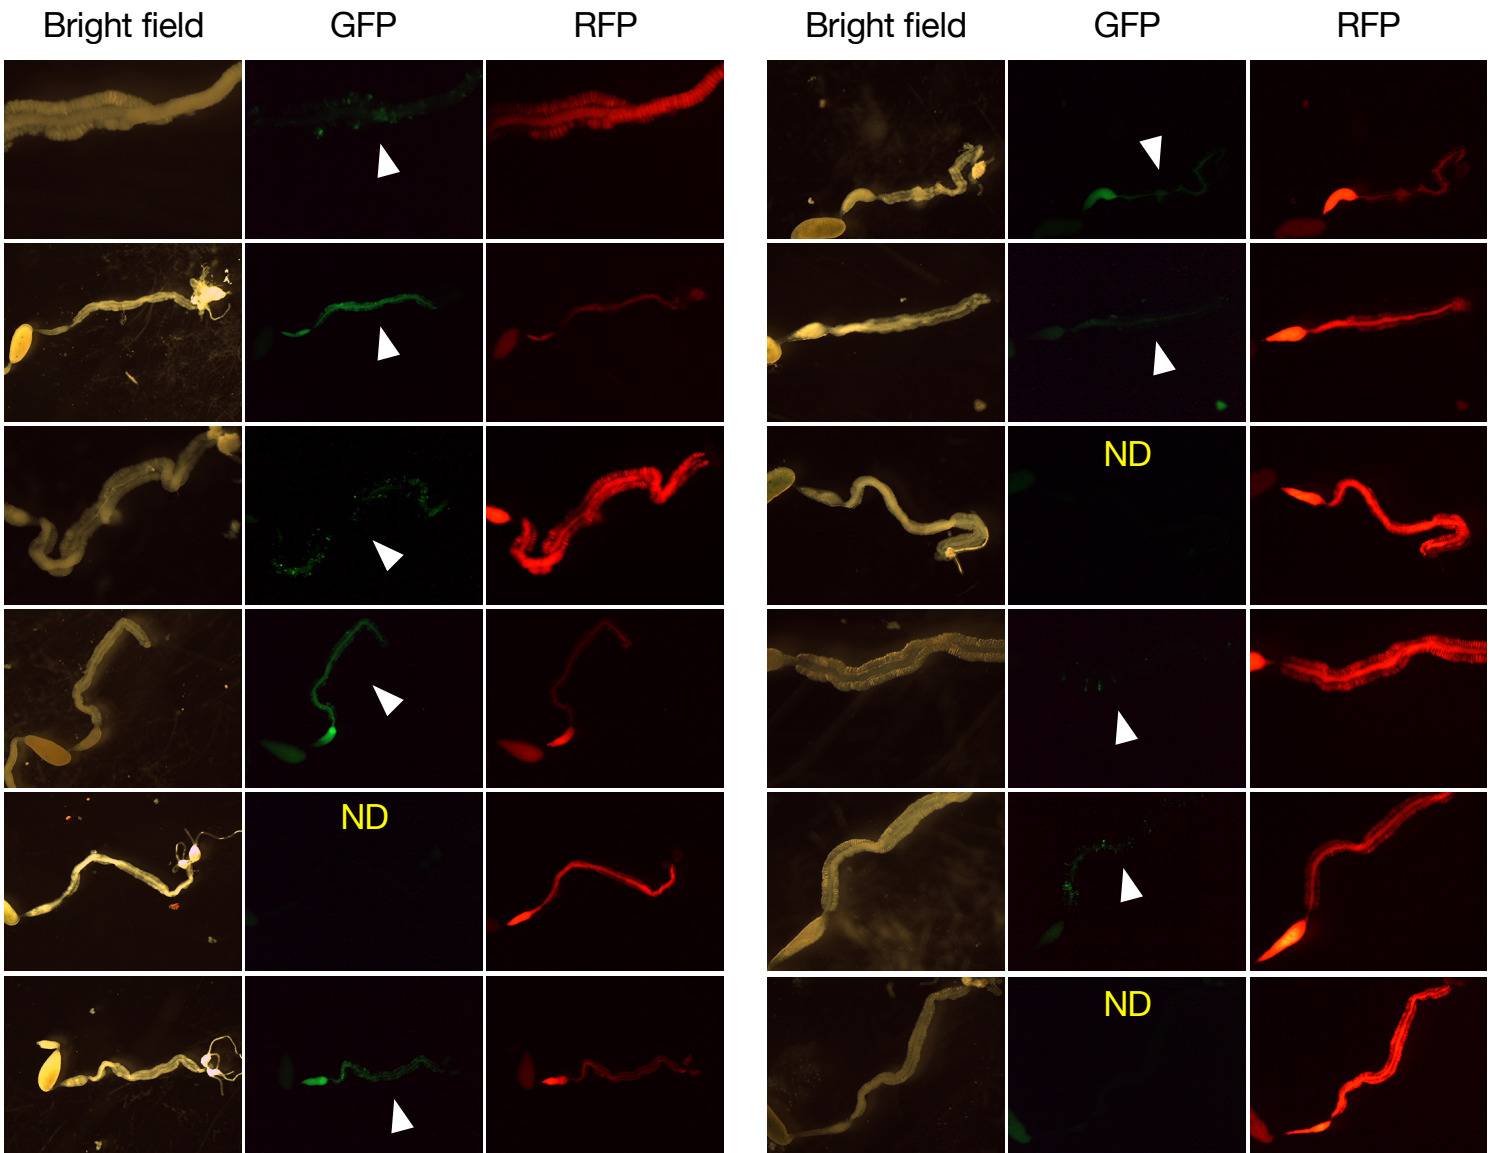

**Fig. S6-continued.** Arrowheads indicate infection of the GFP strain. ND: not detected.



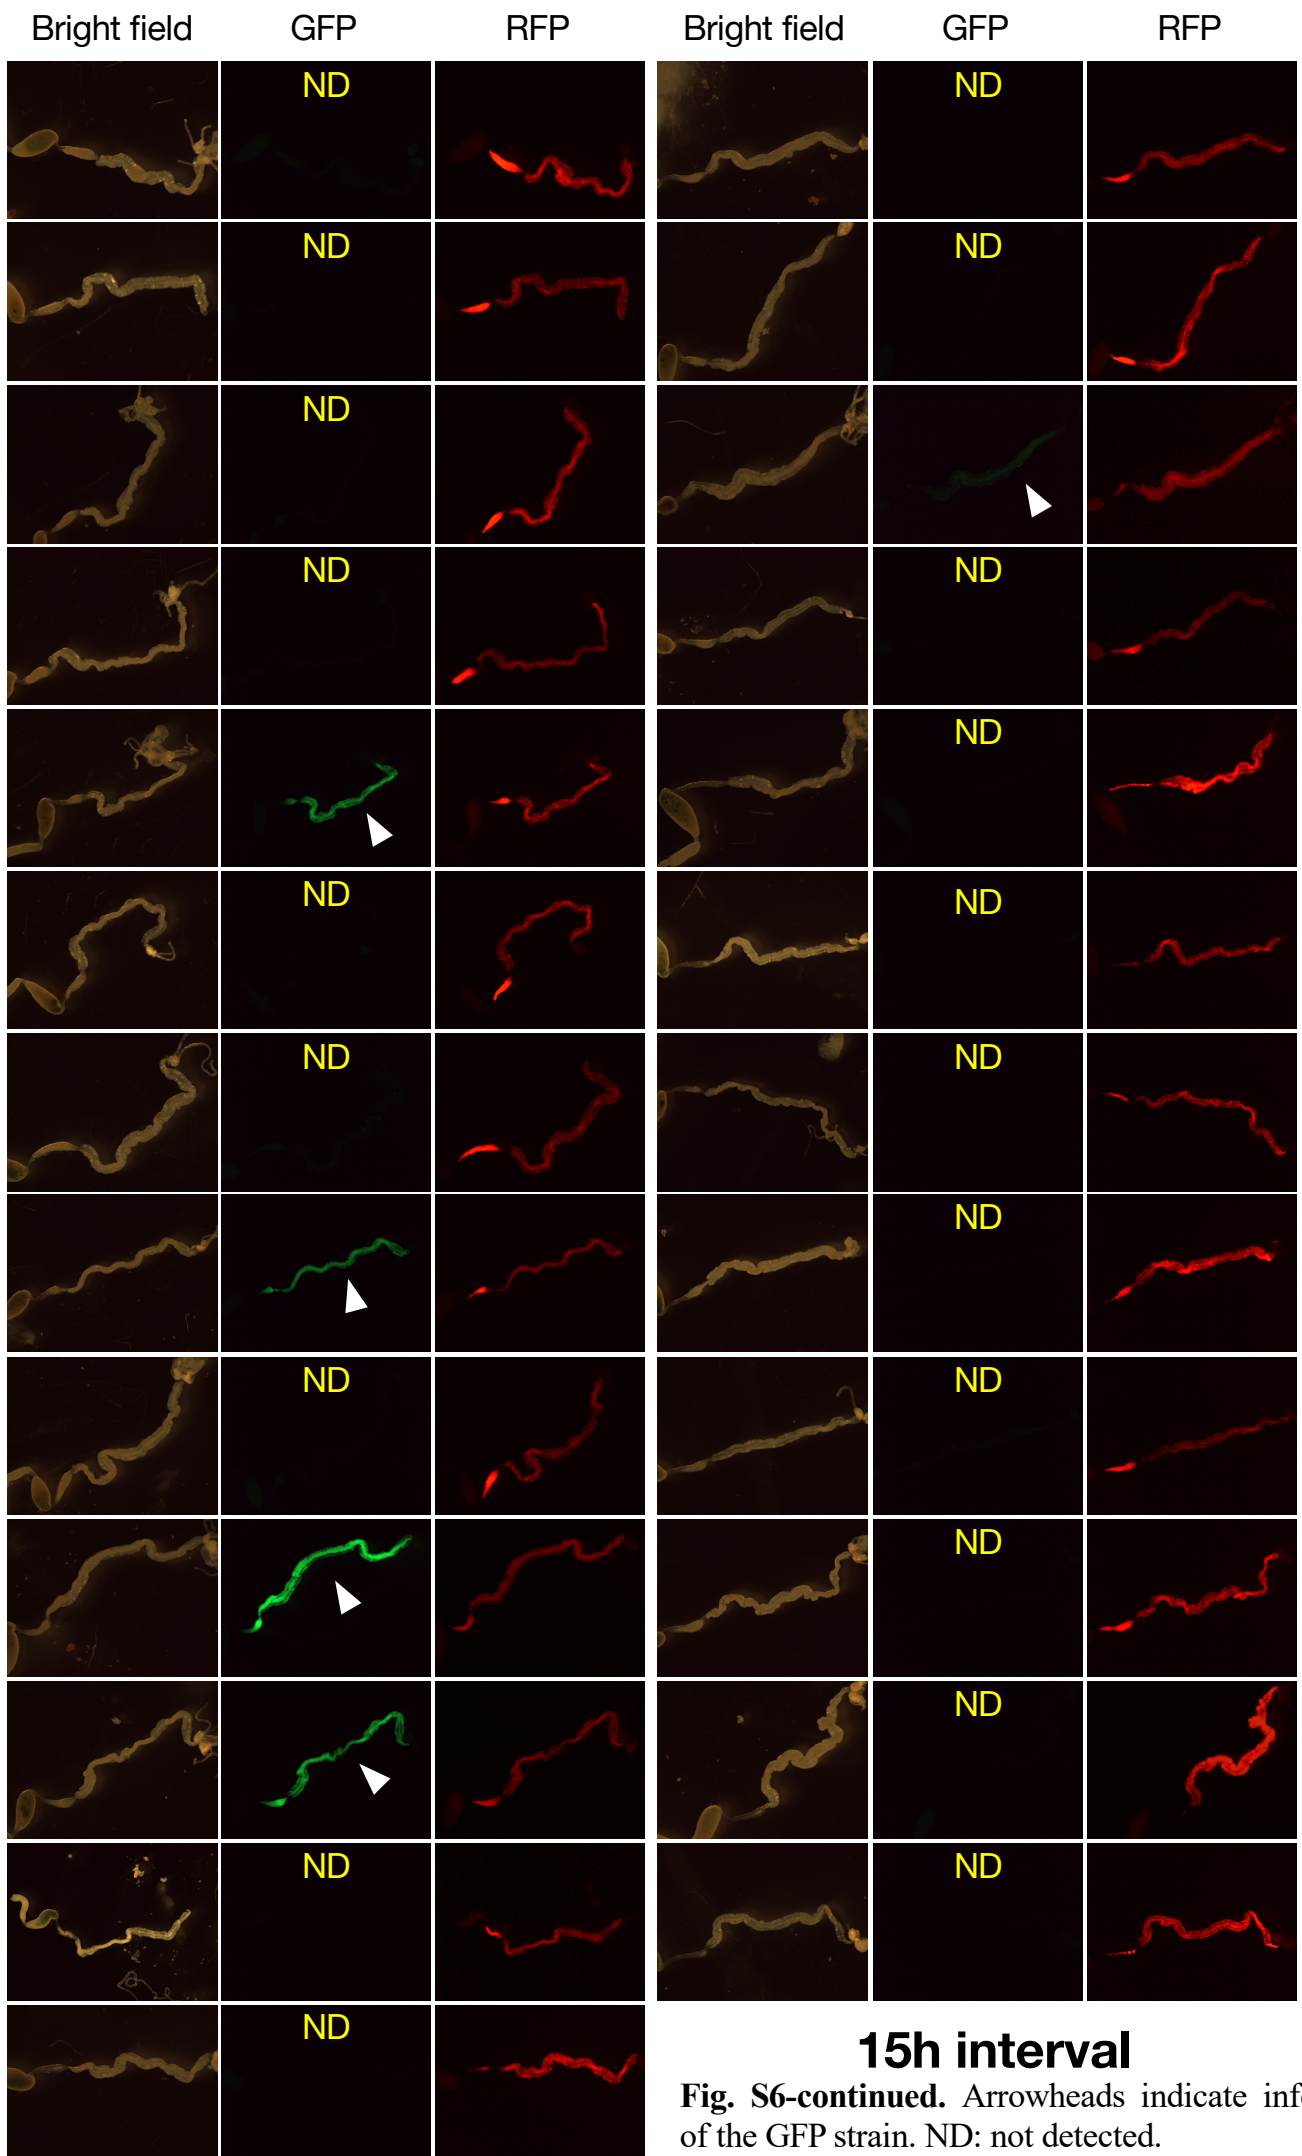

**15h interval**

**Fig. S6-continued.** Arrowheads indicate infection of the GFP strain. ND: not detected.

## 18h interval

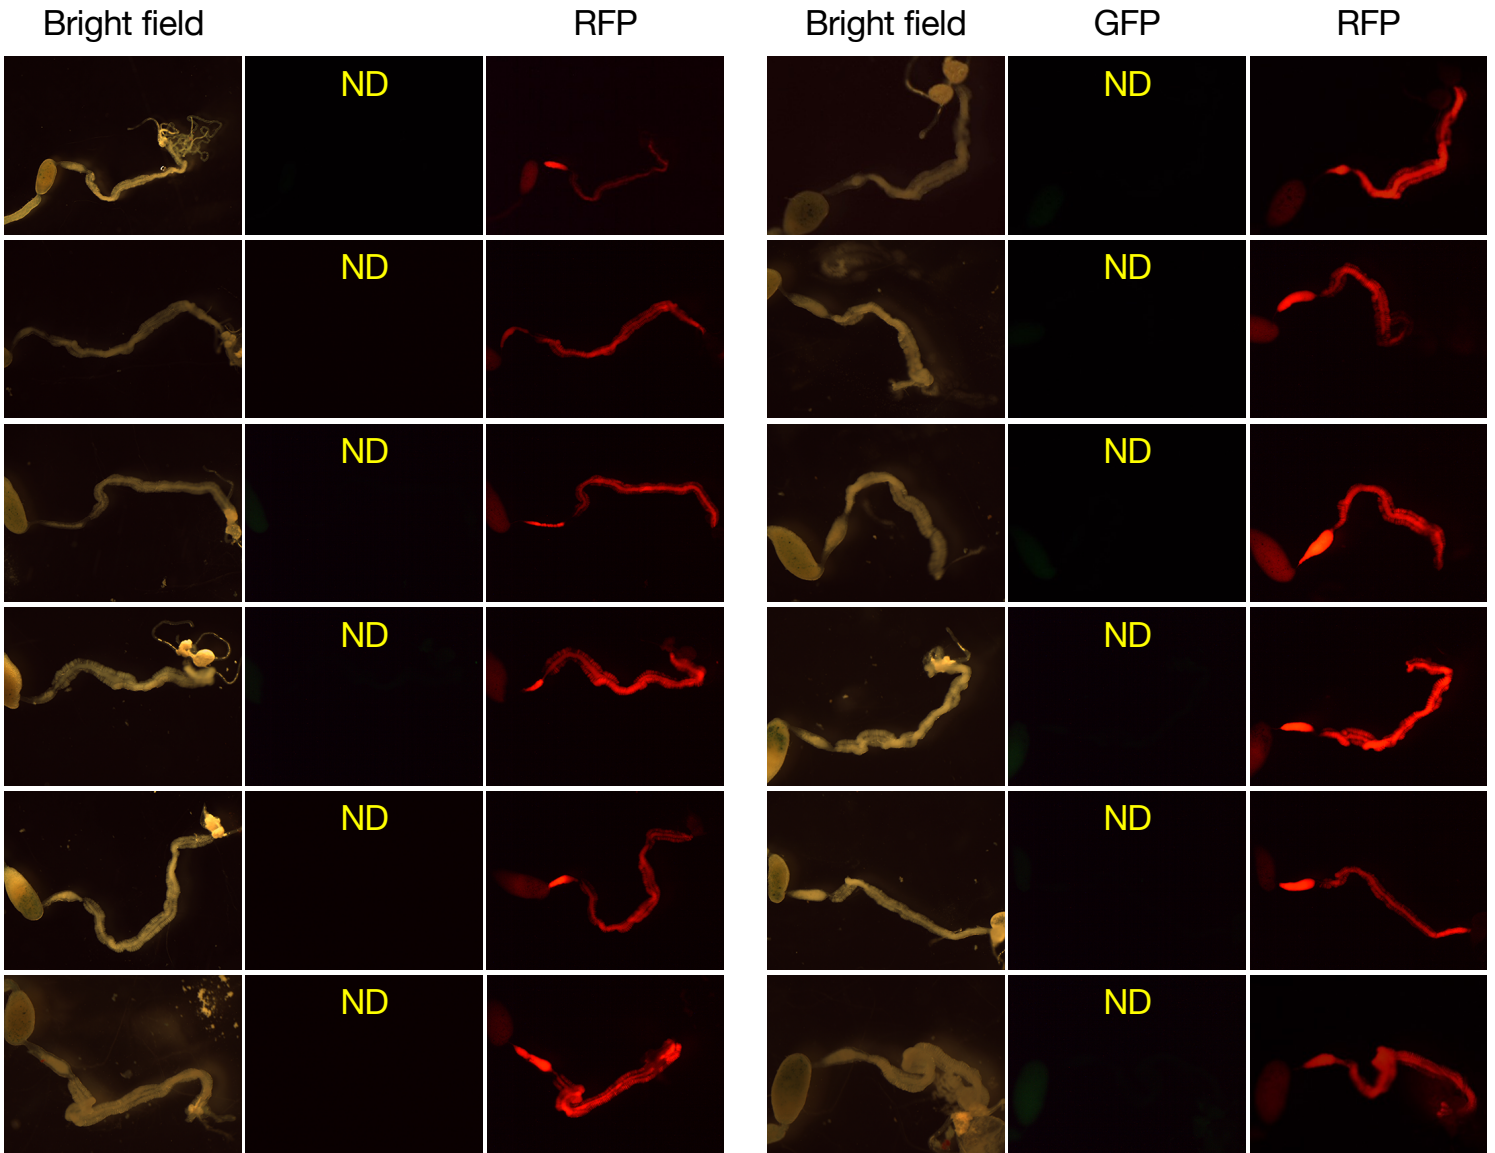

**Fig. S6-continued.** Arrowheads indicate infection of the GFP strain. ND: not detected.



### 3 days interval

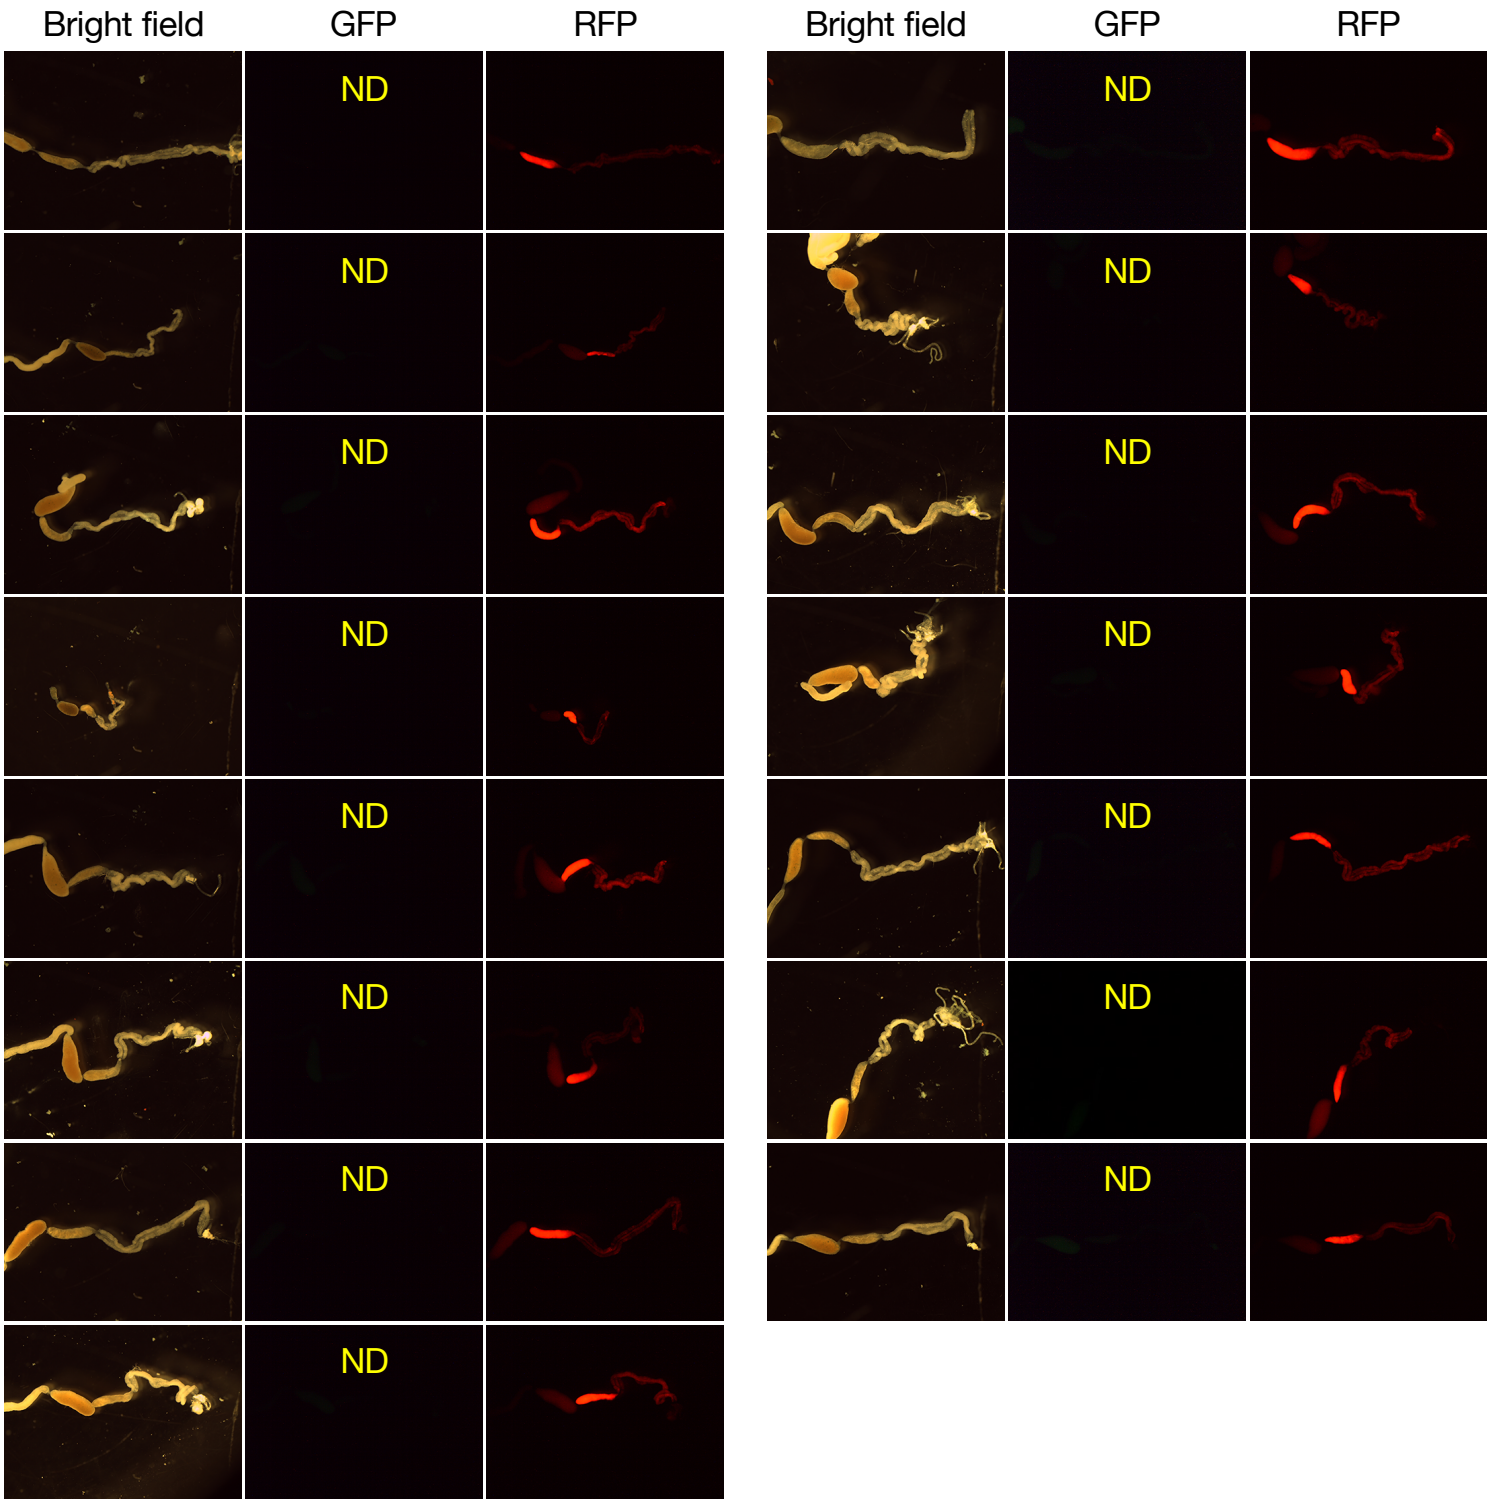

**Fig. S6-continued.** Arrowheads indicate infection of the GFP strain. ND: not detected.
