# Supplementary material
Source: PubMed Central journal article supplement (PMC7305115)
Supplement: 41396_2020_633_MOESM9_ESM.pdf [file 41396_2020_633_MOESM9_ESM.pdf]

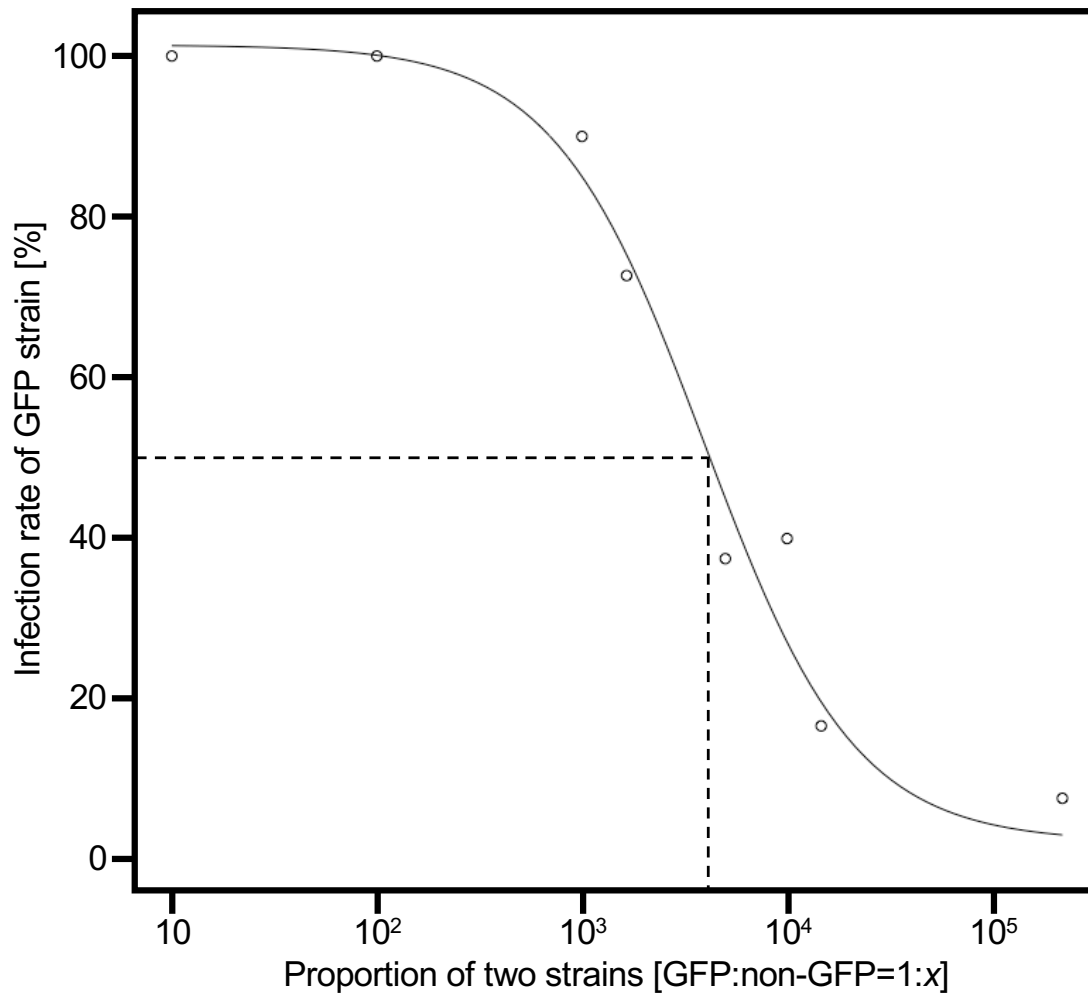

**Fig. S7. The constricted region and midgut closure create a bottleneck on the symbiont population.** In the oral administration experiments, second-instar nymphs were fed with GFP-labelled and non-labelled symbiont strains, mixed in different ratios (1:10; 1:10<sup>2</sup>; 1:10<sup>3</sup>; 1:1.65x10<sup>3</sup>; 1:5.0x10<sup>3</sup>; 1:10<sup>4</sup>; 1:1.5x10<sup>4</sup>; 1: 4.6x10<sup>4</sup> and 1:2.2x10<sup>5</sup>), and the percentage of host individuals colonized by the GFP-labelled symbiont was subsequently determined by plating on selective medium. The dilution ratio at which 50% of the bean bugs carry the GFP-labelled symbiont, indicated by the dotted lines, was determined by using the *drc* package in R software; the equation  $\text{probit} = (y) = 2.2913 + 99.08 / (1 + \exp(1.18 * (x - 3950)))$ .
